# Supplementary material for: Enzymatic activity inside a DNA/peptide complex
Source: Royal Society of Chemistry journal article supplement (doi:10.1039/c7cp04066k), 2017-01-01
Supplement: c7cp04066k1.pdf [file c7cp04066k1.pdf]

Supporting information for:

## Enzymatic activity inside DNA/peptide complex

Wei Pan, Hao Wen, and Dehai Liang\*

Beijing National Laboratory for Molecular Sciences, Key Laboratory of Polymer  
Chemistry & Physics of Ministry of Education, College of Chemistry & Molecular  
Engineering, Peking University, Beijing 100871, P.R. China

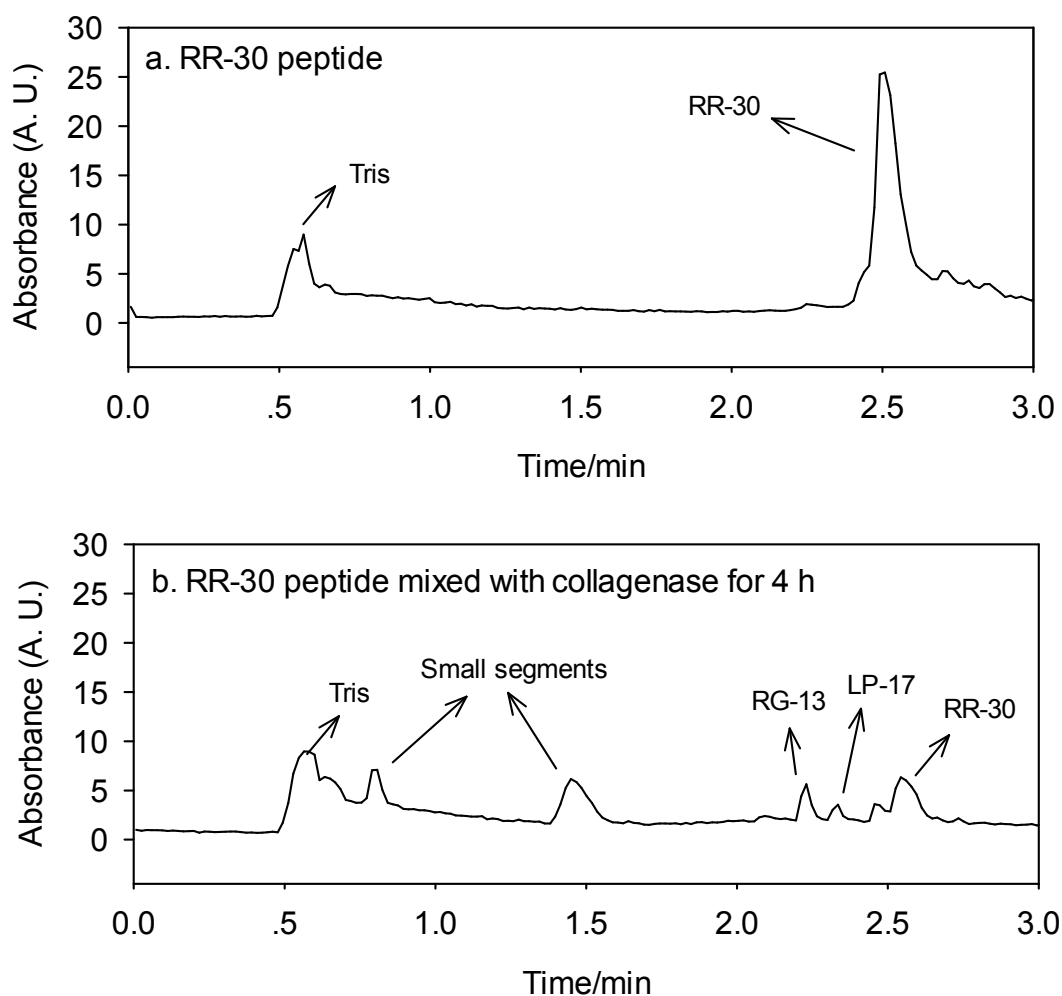

**Figure S1.** UPLC-ESIMS results of RR-30 peptide before and after the enzymatic reaction. The initial concentration of RR-30 was fixed at  $1.0 \times 10^{-4}$  g/mL (ten-fold of the concentration in the complex) to get enough signal. The concentration of collagenase was fixed at  $1.0 \times 10^{-5}$  g/mL. The enzymatic reaction was performed at 25 °C for 4 h. Residual RR-30 peptide could be observed after 4 h. Besides the expected products, some small peptide segments were also observed. These small segments were probably from the LP-17 peptide by the second-cleavage of collagenase.
